# Supplementary material for: A Spatio-Temporal Assessment of Industrial Water Use in African Countries
Source: Research Square preprint supplement (doi:10.21203/rs.3.rs-3644281/v1), 2023-11-24
Supplement: Supplementary file 1 [file a66343453f322df69932c6a3.docx]

Supplementary material for:

A Spatio-Temporal Assessment of Industrial Water Use in African Countries

**Authors:** Edwin Kipkirui a,b ; Sha Lu a,b; Jianfu Zhao a,b **; Tao Wang a,b,c,d *

1. College of Environmental Science and Engineering, Tongji University, Shanghai 200092, China
2. UNEP-Tongji Institute of Environment for Sustainable Development, Shanghai 200092, China
3. Institute of Carbon Neutrality, Tongji University, Shanghai 200092, China
4. Key Laboratory of Cities’ Mitigation and Adaptation to Climate Change in Shanghai, Shanghai, 200092, China

**Table of Contents**

TableS1: The description of the selected countries.

Table S2: The industrial water withdrawal in 20 selected countries. All units in (Km3/Year)

Table S3: The Gross Domestic product (GDP) (Constant 2010 US$)

Figure S1. The Gross Domestic Product of 20 countries in the periods 1988-1997. 1998- 1997, 2008-2017

Figure S2. The Industrial Water withdrawal in 20 countries in the periods 1988-1997. 1998- 2221997, 2008-2017

Figure S3. The industrial value-added change with respect to the GDP in 20 selected 122countries

Figure S4: The population of the 20 selected countries in the period 1987, 1997, 2007 and 1232017

Figure S5: The contribution of the factors influencing the industrial water withdrawal. (a) shows the contribution in the 1988-1997 period, (b) shows the contribution in the 1998-2007 period and (c) refers to the contribution in 2008-2017

Figure S6: The Spatio-temporal decomposition results of industrial water withdrawal during 1988-2017.

Table S1: The description of the selected countries. Source:(WorldOmeter, 2022). June 2022

| Region | Population (Million) | Population growth (%) | Urbanization rate (%) | Area (Km2) | Selected Countries |
| --- | --- | --- | --- | --- | --- |
| Northern | 254.05 | 1.56 | 52.4 | 7.76 | Egypt, Tunisia, Morocco, Sudan, Algeria |
| Eastern | 467.44 | 2.71 | 47.7 | 6.67 | Kenya, Ethiopia, Uganda, Tanzania |
| Middle Africa | 189.56 | 3.1 | 50.5 | 6.5 | DR. Congo, Angola, Cameroon |
| Southern | 69.17 | 1.40 | 64.7 | 2.65 | South Africa, Botswana, Zambia |
| Western | 421.56 | 2.70 | 47.7 | 6.06 | Senegal, Mali, Ivory Coast, Nigeria, Ghana |

Table S2: The industrial water withdrawal in 20 selected countries. All units in (Km3/Year)(2020, FAO)

| Countries | 1988-1992 | 1993-1997 | 1998-2002 | 2003-2007 | 2008-2012 | 2013-2017 |
| --- | --- | --- | --- | --- | --- | --- |
| Tanzania | 0.025 | 0.025 | 0.025 | 0.025 | 0.025 | 0.025 |
| Algeria | 0.644 | 0.554 | 0.486 | 0.450 | 0.415 | 0.191 |
| Angola | 0.101 | 0.153 | 0.207 | 0.240 | 0.240 | 0.240 |
| Botswana | 0.023 | 0.031 | 0.037 | 0.037 | 0.036 | 0.023 |
| Cameroon | 0.076 | 0.071 | 0.083 | 0.105 | 0.105 | 0.105 |
| Democratic Republic of the Congo | 0.071 | 0.103 | 0.132 | 0.147 | 0.147 | 0.147 |
| Egypt | 4.200 | 4.257 | 3.600 | 2.600 | 1.200 | 5.400 |
| Ethiopia | 0.021 | 0.020 | 0.021 | 0.051 | 0.051 | 0.051 |
| Ghana | 0.080 | 0.089 | 0.095 | 0.095 | 0.095 | 0.095 |
| Ivory coast | 0.196 | 0.270 | 0.289 | 0.301 | 0.259 | 0.242 |
| Kenya | 0.083 | 0.091 | 0.098 | 0.114 | 0.125 | 0.303 |
| Mali | 0.011 | 0.009 | 0.006 | 0.004 | 0.004 | 0.004 |
| Morocco | 0.322 | 0.346 | 0.766 | 0.420 | 0.212 | 0.212 |
| Nigeria | 0.933 | 1.321 | 1.718 | 1.965 | 1.965 | 1.965 |
| Senegal | 0.048 | 0.056 | 0.058 | 0.058 | 0.058 | 0.058 |
| South Africa | 1.310 | 1.082 | 1.140 | 1.361 | 1.581 | 4.100 |
| Sudan | 0.050 | 0.051 | 0.050 | 0.050 | 0.075 | 0.075 |
| Tunisia | 0.091 | 0.103 | 0.123 | 0.147 | 0.298 | 0.965 |
| Uganda | 0.047 | 0.054 | 0.046 | 0.049 | 0.050 | 0.050 |
| Zambia | 0.107 | 0.124 | 0.130 | 0.130 | 0.130 | 0.130 |

Table S3: The Gross Domestic product (GDP) (Constant 2010 US$) (World_Bank, 2019)

|  |  | | |  |
| --- | --- | --- | --- | --- |
| Country Name | 1987 [YR1987] | 1997 [YR1997] | 2007 [YR2007] | 2017 [YR2017] |
| Algeria | 8.83E+10 | 9.81E+10 | 1.5E+11 | 1.98E+11 |
| Angola | 3.12E+10 | 3.28E+10 | 7.16E+10 | 1.02E+11 |
| Botswana | 3.69E+09 | 7.62E+09 | 1.2E+10 | 1.73E+10 |
| Cameroon | 1.86E+10 | 1.58E+10 | 2.39E+10 | 3.64E+10 |
| Congo, Dem. Rep. | 2.62E+10 | 1.56E+10 | 1.84E+10 | 3.33E+10 |
| Cote d'Ivoire | 1.73E+10 | 2.14E+10 | 2.31E+10 | 3.91E+10 |
| Egypt, Arab Rep. | 7.48E+10 | 1.15E+11 | 1.86E+11 | 2.72E+11 |
| Ethiopia | 9.69E+09 | 1.21E+10 | 2.21E+10 | 5.84E+10 |
| Ghana | 1.05E+10 | 1.62E+10 | 2.61E+10 | 5.06E+10 |
| Kenya | 1.88E+10 | 2.46E+10 | 3.56E+10 | 5.81E+10 |
| Mali | 3.74E+09 | 5.35E+09 | 9.24E+09 | 1.42E+10 |
| Morocco | 3.63E+10 | 5.21E+10 | 8.13E+10 | 1.19E+11 |
| Nigeria | 1.17E+11 | 1.55E+11 | 2.9E+11 | 4.58E+11 |
| Senegal | 8.27E+09 | 9.89E+09 | 1.46E+10 | 2.25E+10 |
| South Africa | 2.1E+11 | 2.49E+11 | 3.59E+11 | 4.26E+11 |
| Sudan | 1.93E+10 | 2.98E+10 | 5.7E+10 | 8.52E+10 |
| Tanzania | 1.29E+10 | 1.49E+10 | 2.71E+10 | 4.97E+10 |
| Tunisia | 1.67E+10 | 2.5E+10 | 3.96E+10 | 4.97E+10 |
| Uganda | 5.65E+09 | 1.12E+10 | 2.17E+10 | 3.76E+10 |
| Zambia | 8.01E+09 | 9.12E+09 | 1.56E+10 | 2.8E+10 |


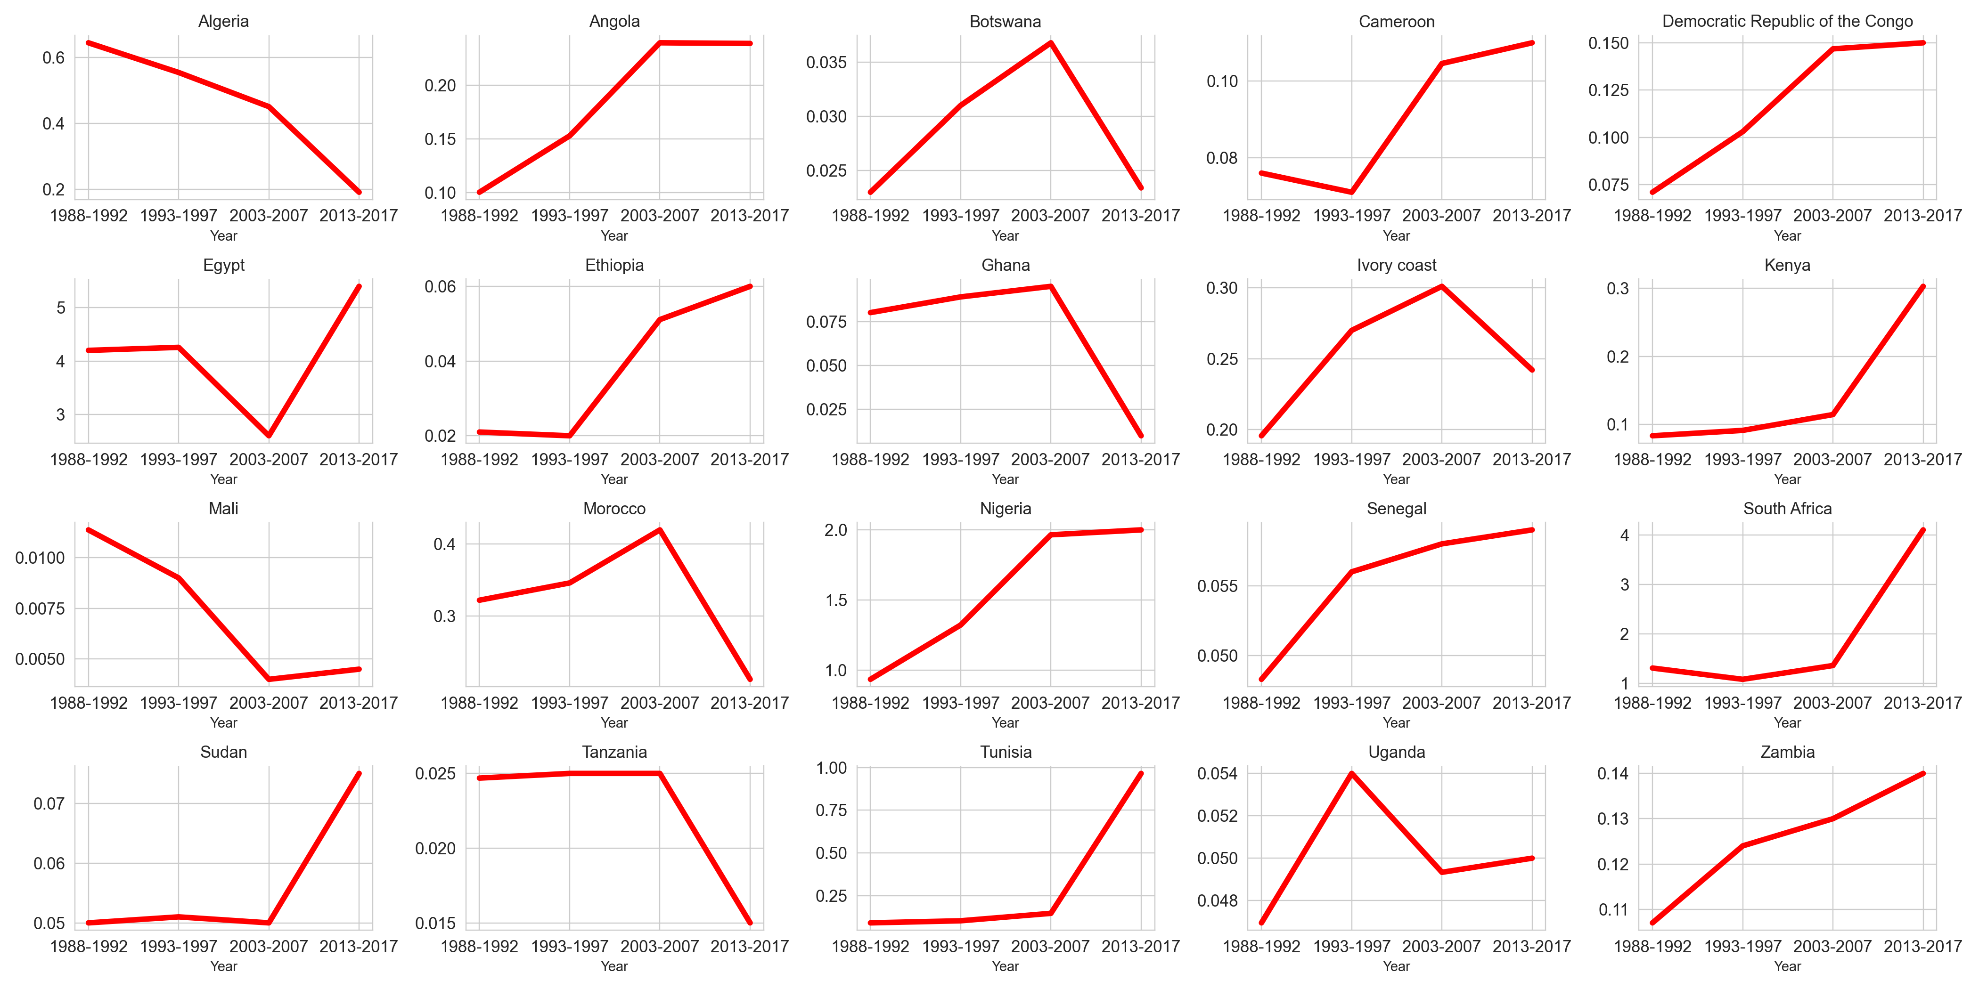


Figure S1. The Gross Domestic Product trends of 20 countries in the periods 1988-1997. 1998-2997, 2008-2017


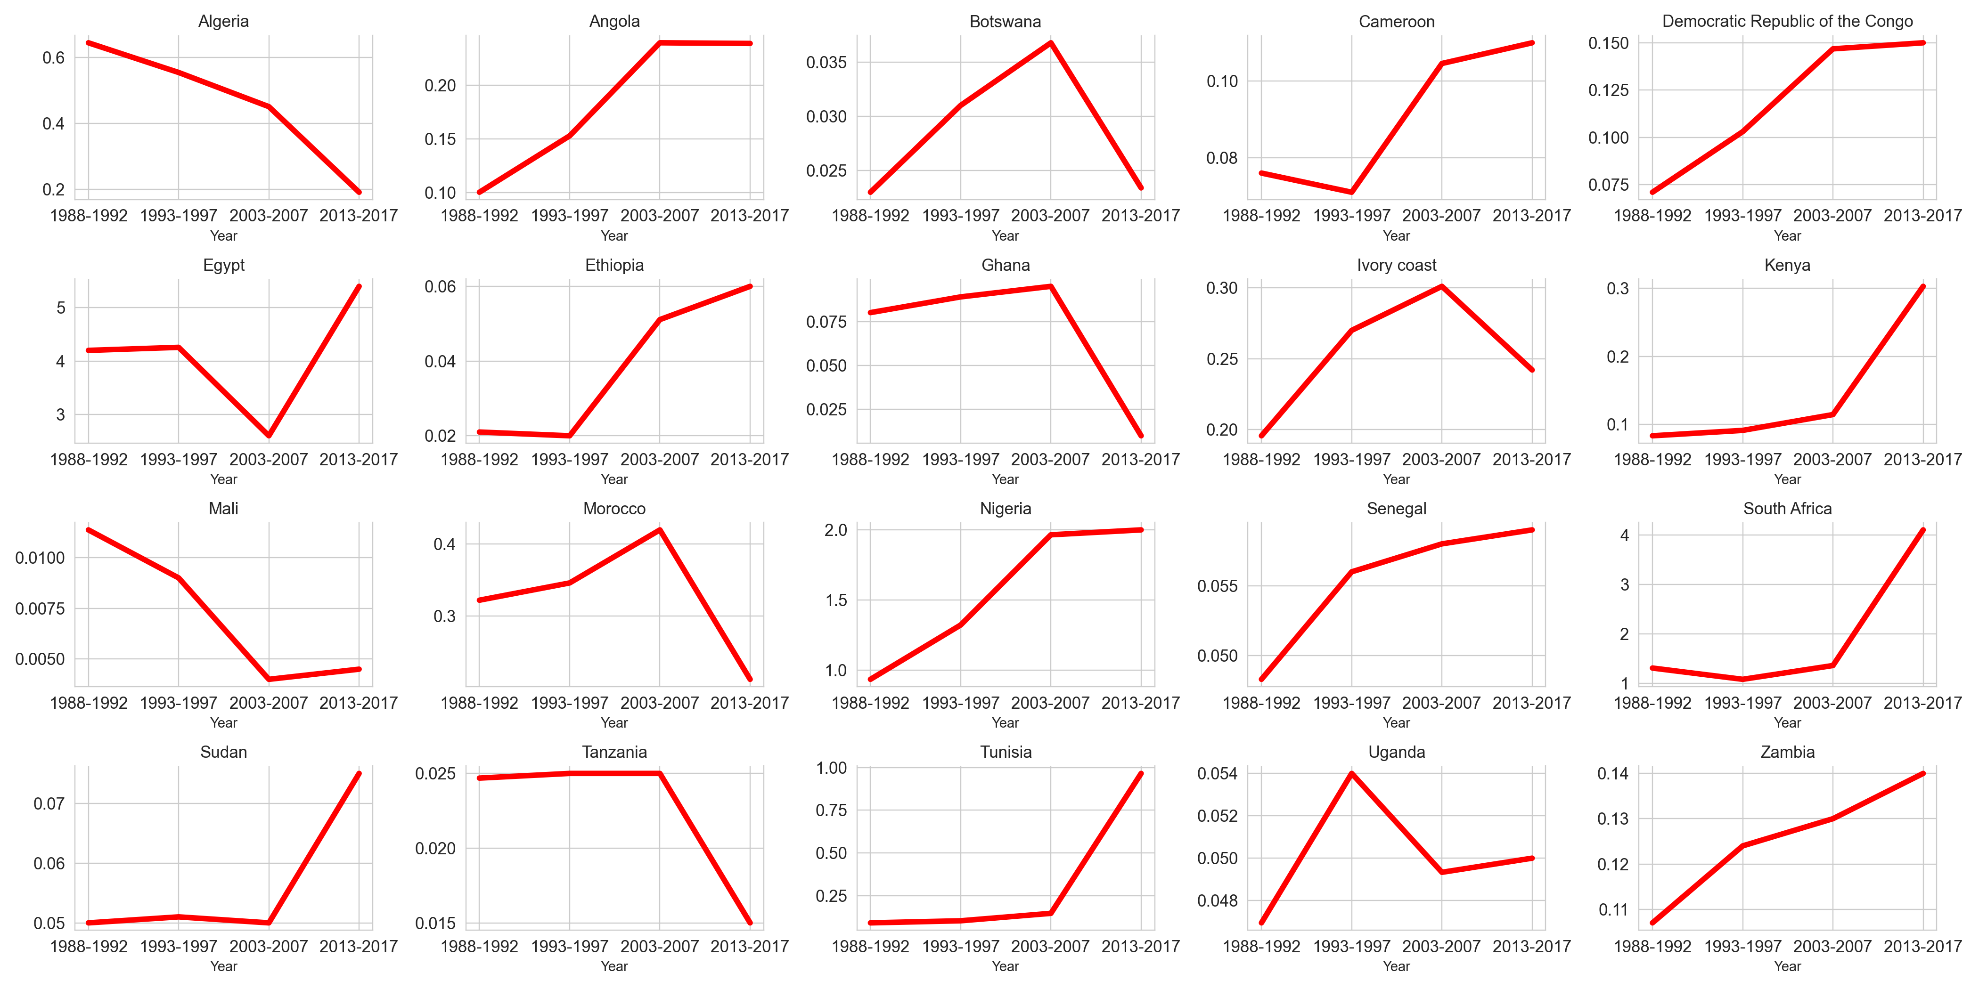


Figure S2. The Industrial Water withdrawal trends in 20 countries in the periods 1988-1997. 1998-2997, 2008-2017

Figure S3. The industrial value-added change with respect to the GDP in 20 selected countries(Knoema, 2022)

Figure S4: The population of the 20 selected countries in the period 1987, 1997, 2007 and 2017(World_Bank, 2019)


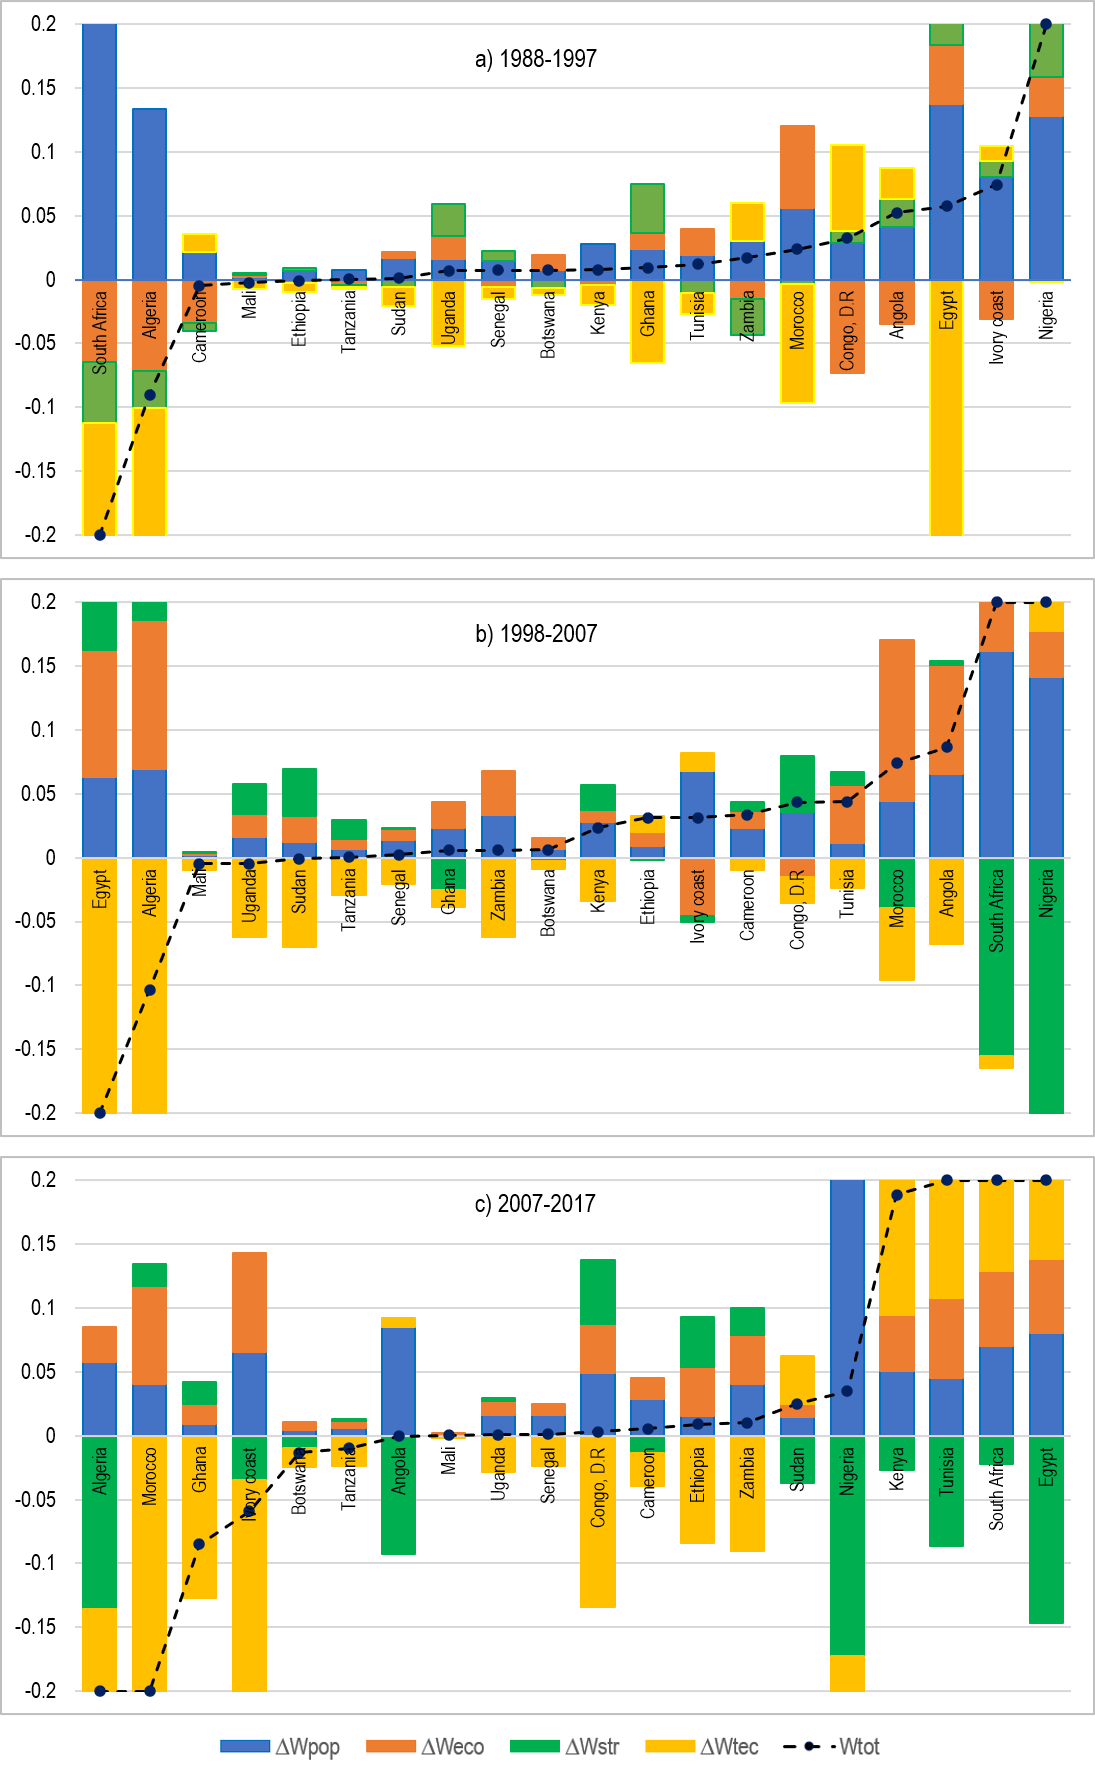
Figure S5: The contribution of the factors influencing the industrial water withdrawal. (a) shows the contribution in the 1988-1997 period, (b) shows the contribution in the 1998-2007 period and (c) refers to the contribution in 2008-2017


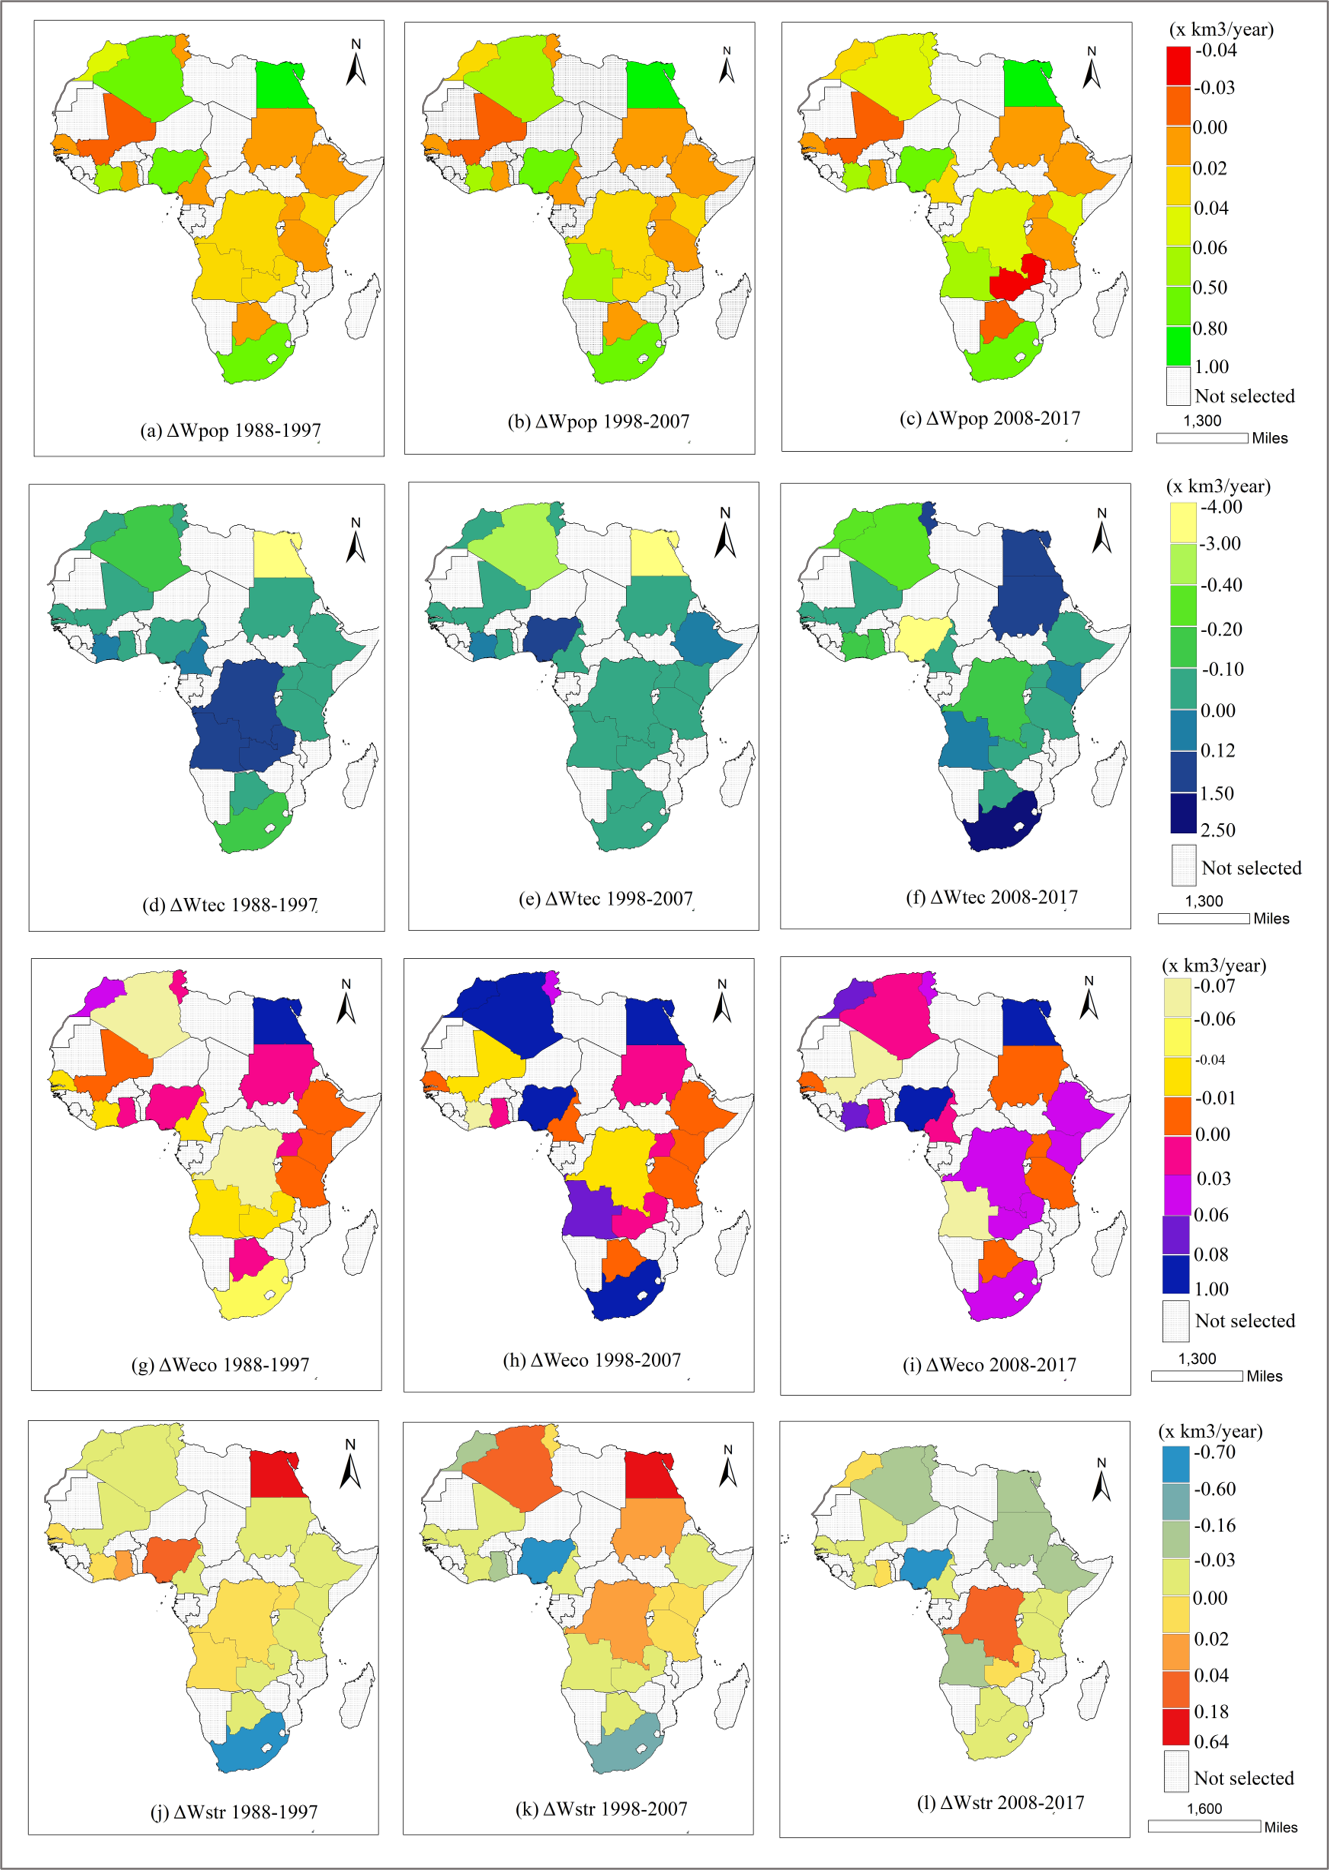


Figure S6: The Spatio-temporal decomposition results of industrial water withdrawal during 1988-2017.

**References**

2020, FAO. <https://www.fao.org/aquastat/statistics/query/index.html>. Accessed on 30/03/2023

Knoema, 2022. <https://public.knoema.com/lftihvf/world-development-indicators-wdi>. Accessed on 30/04/2023

World_Bank, 2019. <https://data.worldbank.org/country/kenya>. Accessed on 30/05/2023

WorldOmeter, 2022. <https://www.worldometers.info/population/africa/>. Accessed on 30/10/2022
